# Supplementary material for: Reassessing Google Flu Trends Data for Detection of Seasonal and Pandemic Influenza: A Comparative Epidemiological Study at Three Geographic Scales
Source: PubMed Central journal article supplement (PMC3798275; doi:10.1371/journal.pcbi.1003256), 2013-10-17
Supplement: pcbi.1003256.s001.pdf [file pcbi.1003256.s001.pdf]

**Figure S1 – National level influenza season observed and model baseline data, 2003-2013**

United States, CDC Sentinel Physician Network, percent Influenza-like Illness (ILI) surveillance visits

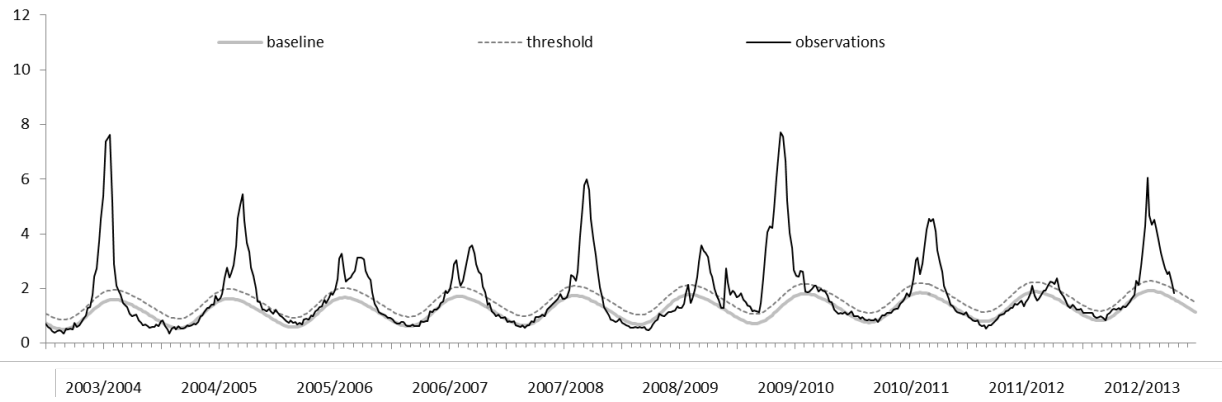

United States, Google Flu Trends (GFT) original model percent ILI

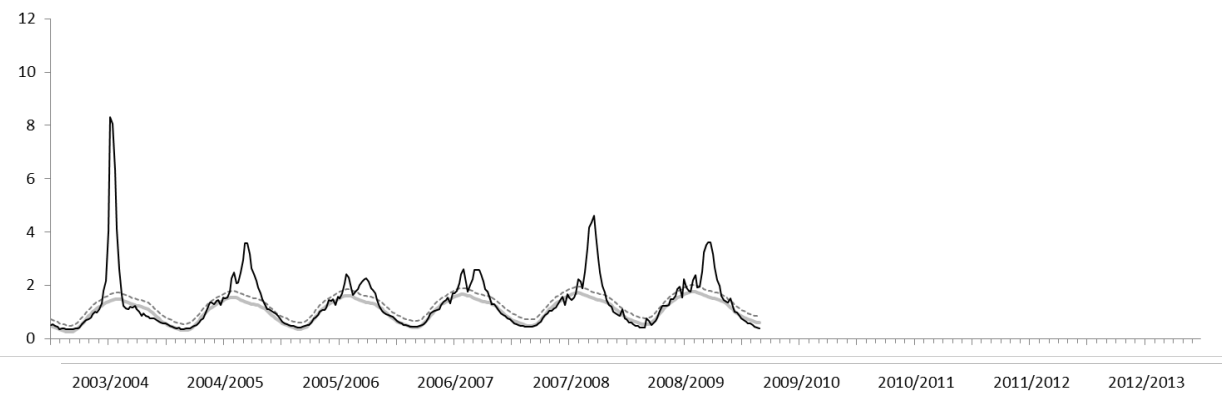

United States, Google Flu Trends (GFT) updated model percent ILI

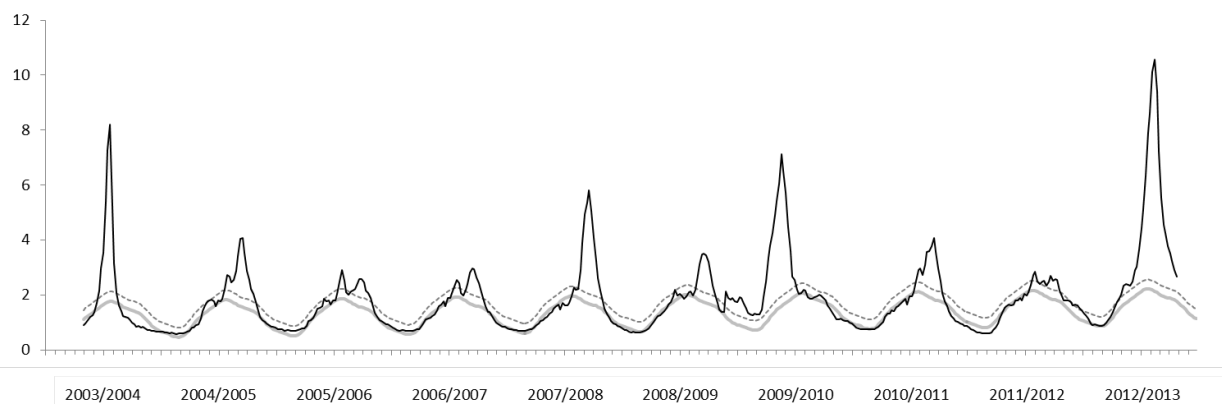

Date (influenza season)
