# Supplementary material for: Reassessing Google Flu Trends Data for Detection of Seasonal and Pandemic Influenza: A Comparative Epidemiological Study at Three Geographic Scales
Source: PubMed Central journal article supplement (PMC3798275; doi:10.1371/journal.pcbi.1003256), 2013-10-17

**Figure S2 – Comparison of national level influenza-like illness (ILI) surveillance and Google Flu Trends (GFT) original and updated models**

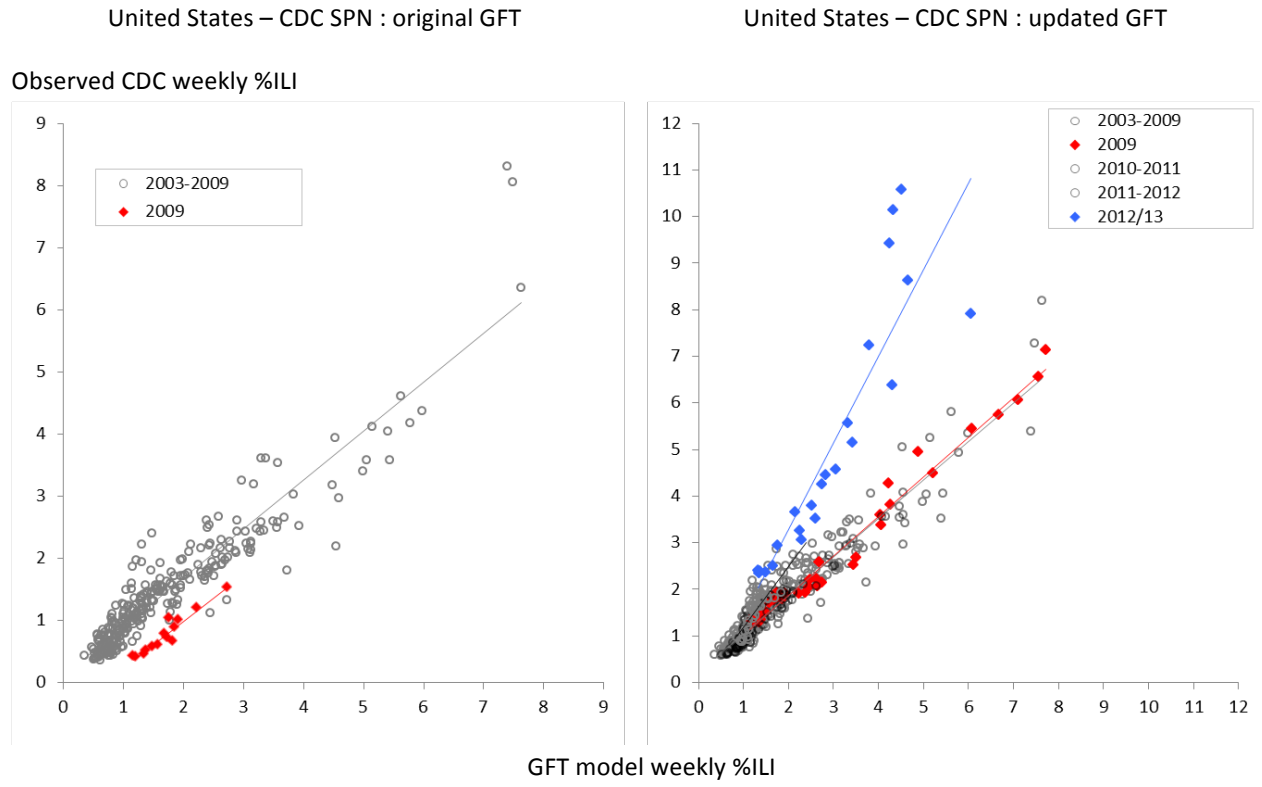

Supplement: pcbi.1003256.s002.pdf [file pcbi.1003256.s002.pdf]
