# Supplementary material for: Reassessing Google Flu Trends Data for Detection of Seasonal and Pandemic Influenza: A Comparative Epidemiological Study at Three Geographic Scales
Source: PubMed Central journal article supplement (PMC3798275; doi:10.1371/journal.pcbi.1003256), 2013-10-17
Supplement: pcbi.1003256.s003.pdf [file pcbi.1003256.s003.pdf]

**Figure S3 – Mid-Atlantic State seasonal observed and model baseline, 2003-2013**

Mid-Atlantic Census Region (NJ, NY, PA), CDC Sentinel Physician Network, Influenza-like Illness (ILI) surveillance

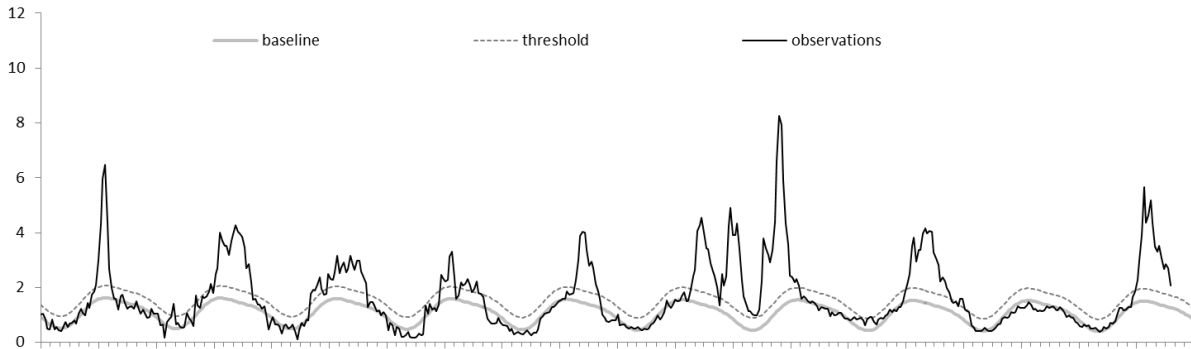

HHS Surveillance Region 2 (NJ, NY), CDC Sentinel Physician Network, Influenza-like Illness (ILI) surveillance

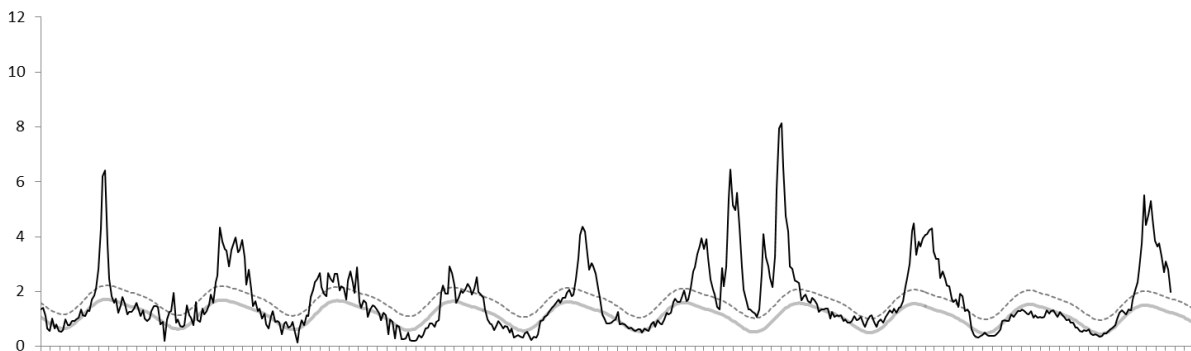

Mid-Atlantic Census Region (NJ, NY, PA), Google Flu Trends (GFT) original model percent ILI

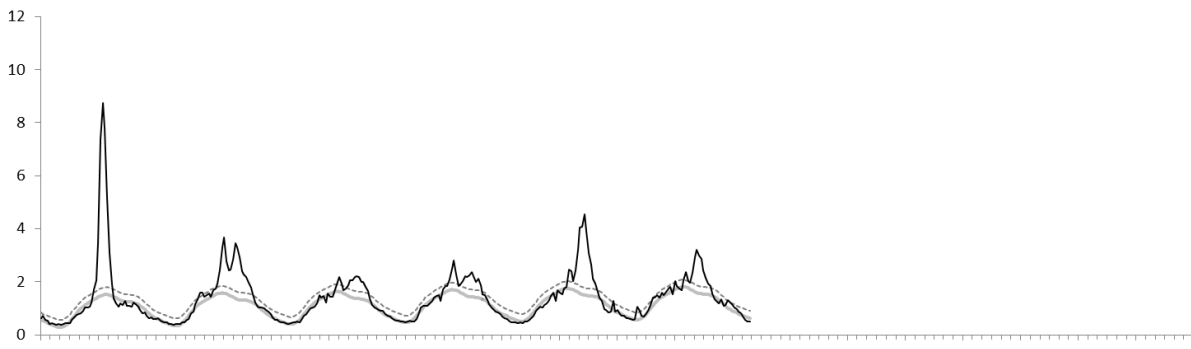

HHS Surveillance Region 2 (NJ, NY), Google Flu Trends (GFT) updated model percent ILI

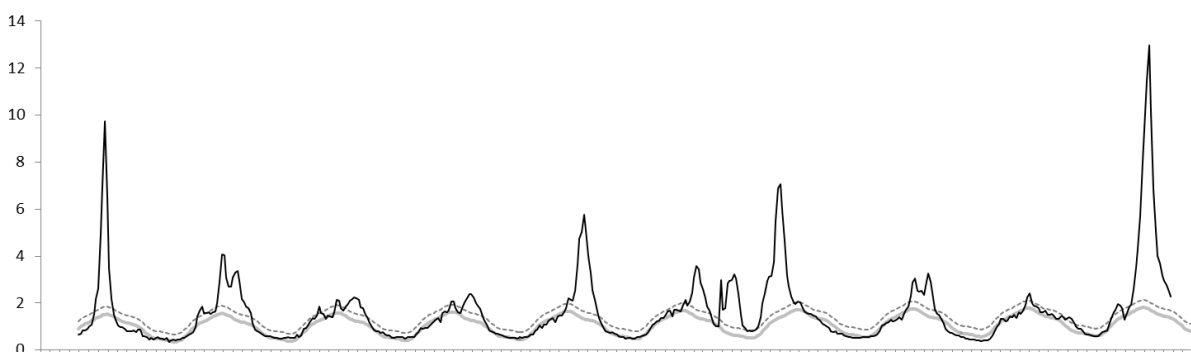

2003/2004 2004/2005 2005/2006 2006/2007 2007/2008 2008/2009 2009/2010 2010/2011 2011/2012 2012/2013

Date (influenza season)
