# Supplementary material for: Reassessing Google Flu Trends Data for Detection of Seasonal and Pandemic Influenza: A Comparative Epidemiological Study at Three Geographic Scales
Source: PubMed Central journal article supplement (PMC3798275; doi:10.1371/journal.pcbi.1003256), 2013-10-17
Supplement: pcbi.1003256.s004.pdf [file pcbi.1003256.s004.pdf]

**Figure S4 – Comparison of Mid-Atlantic State influenza-like illness (ILI) surveillance and Google Flu Trends (GFT) original and updated models**

Mid-Atlantic (NJ, NY, PA) - CDC SPN : original GFT

Mid-Atlantic (NJ, NY) - CDC SPN : updated GFT

Observed CDC weekly %ILI

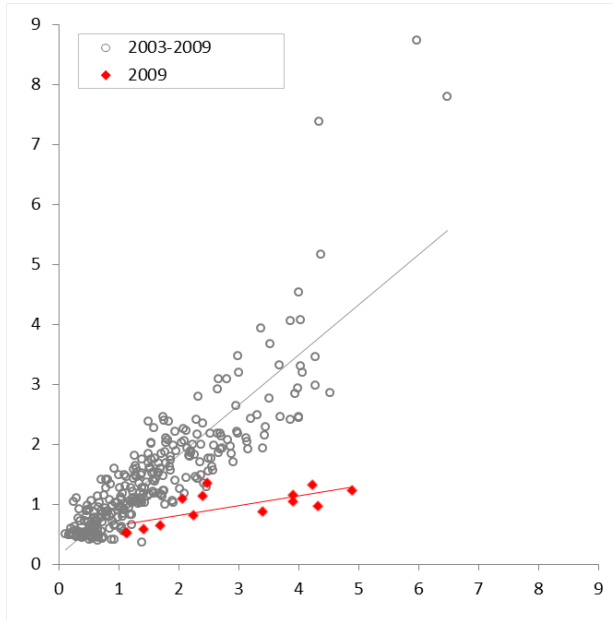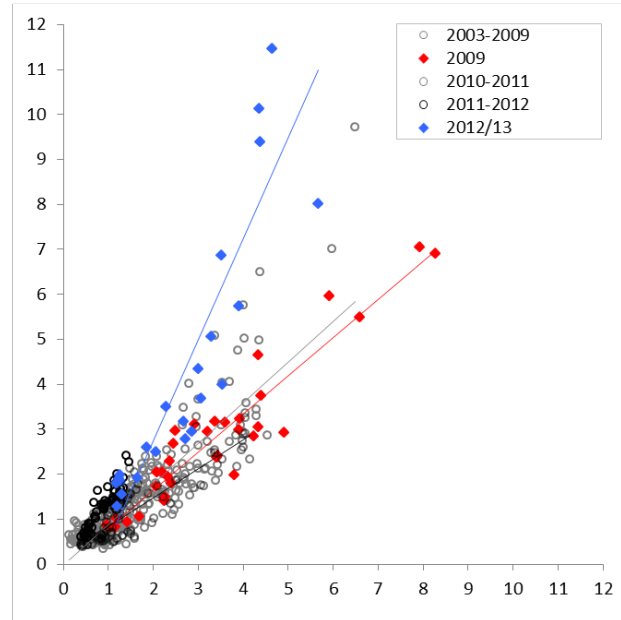

GFT model weekly %ILI
