# Supplementary material for: Reassessing Google Flu Trends Data for Detection of Seasonal and Pandemic Influenza: A Comparative Epidemiological Study at Three Geographic Scales
Source: PubMed Central journal article supplement (PMC3798275; doi:10.1371/journal.pcbi.1003256), 2013-10-17
Supplement: pcbi.1003256.s005.pdf [file pcbi.1003256.s005.pdf]

**Figure S5 – New York influenza season observed and model baseline data, 2003-2013**

New York City, Emergency Department (ED) percent influenza-like illness (ILI) syndromic surveillance visits

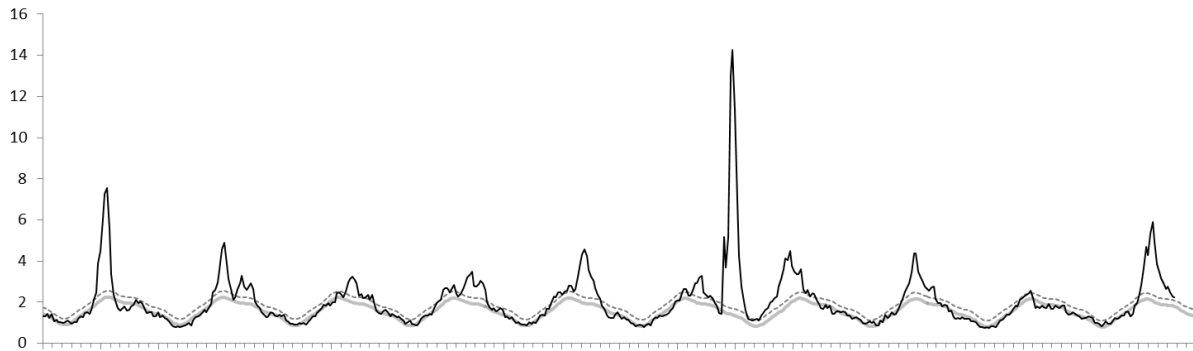

New York State, Google Flu Trends (GFT) updated model percent ILI

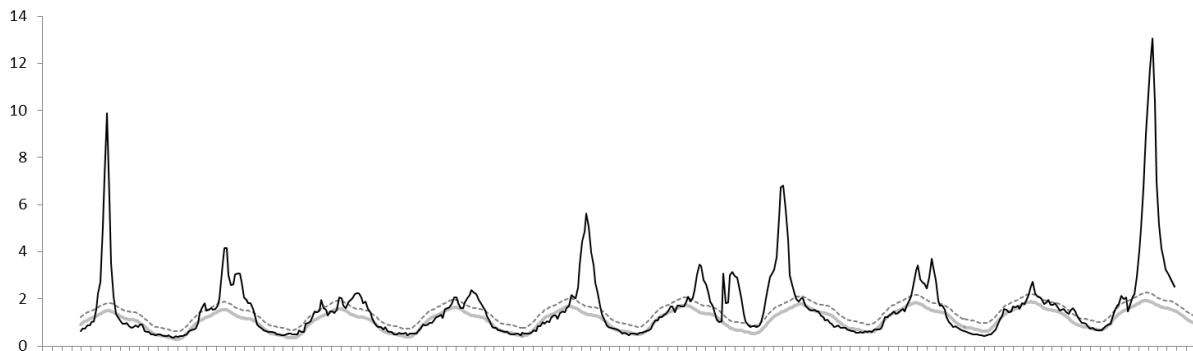

New York City (experimental), Google Flu Trends (GFT) updated model percent ILI

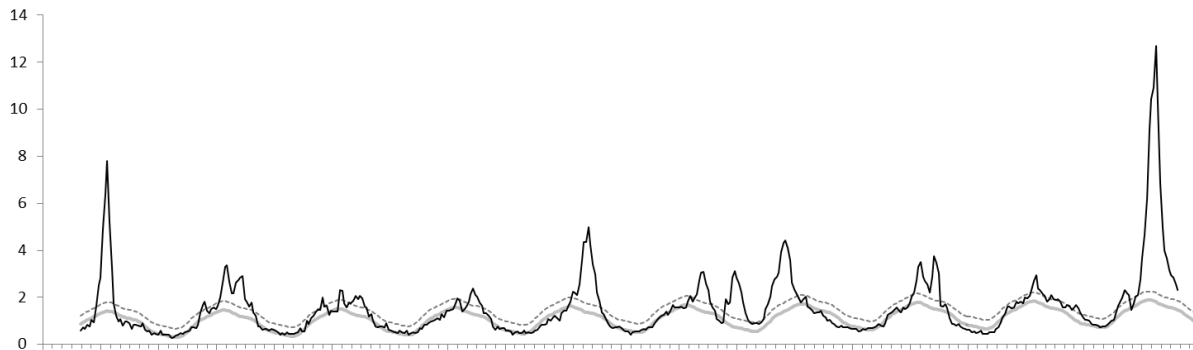

New York State, Google Flu Trends (GFT) original model percent ILI

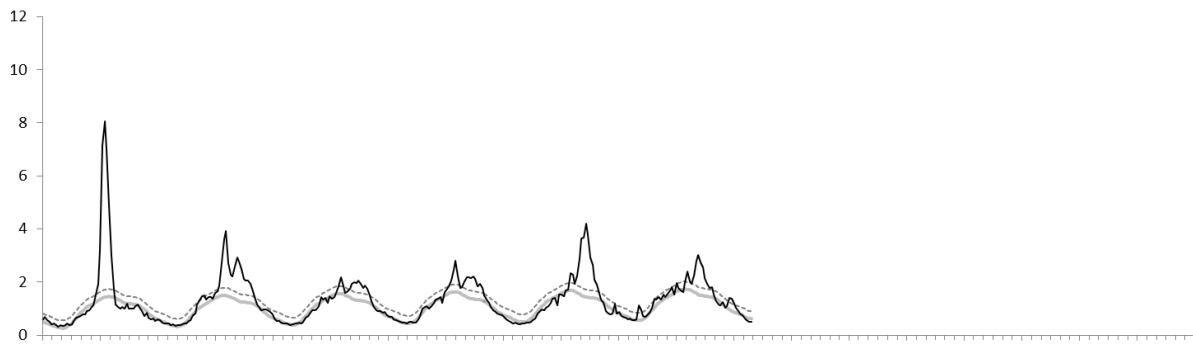

2003/2004 2004/2005 2005/2006 2006/2007 2007/2008 2008/2009 2009/2010 2010/2011 2011/2012 2012/2013

Date (influenza season)
