# Supplementary material for: Reassessing Google Flu Trends Data for Detection of Seasonal and Pandemic Influenza: A Comparative Epidemiological Study at Three Geographic Scales
Source: PubMed Central journal article supplement (PMC3798275; doi:10.1371/journal.pcbi.1003256), 2013-10-17

Figure S6 – Comparison of New York State and New York City Google Flu Trends (GFT) updated models

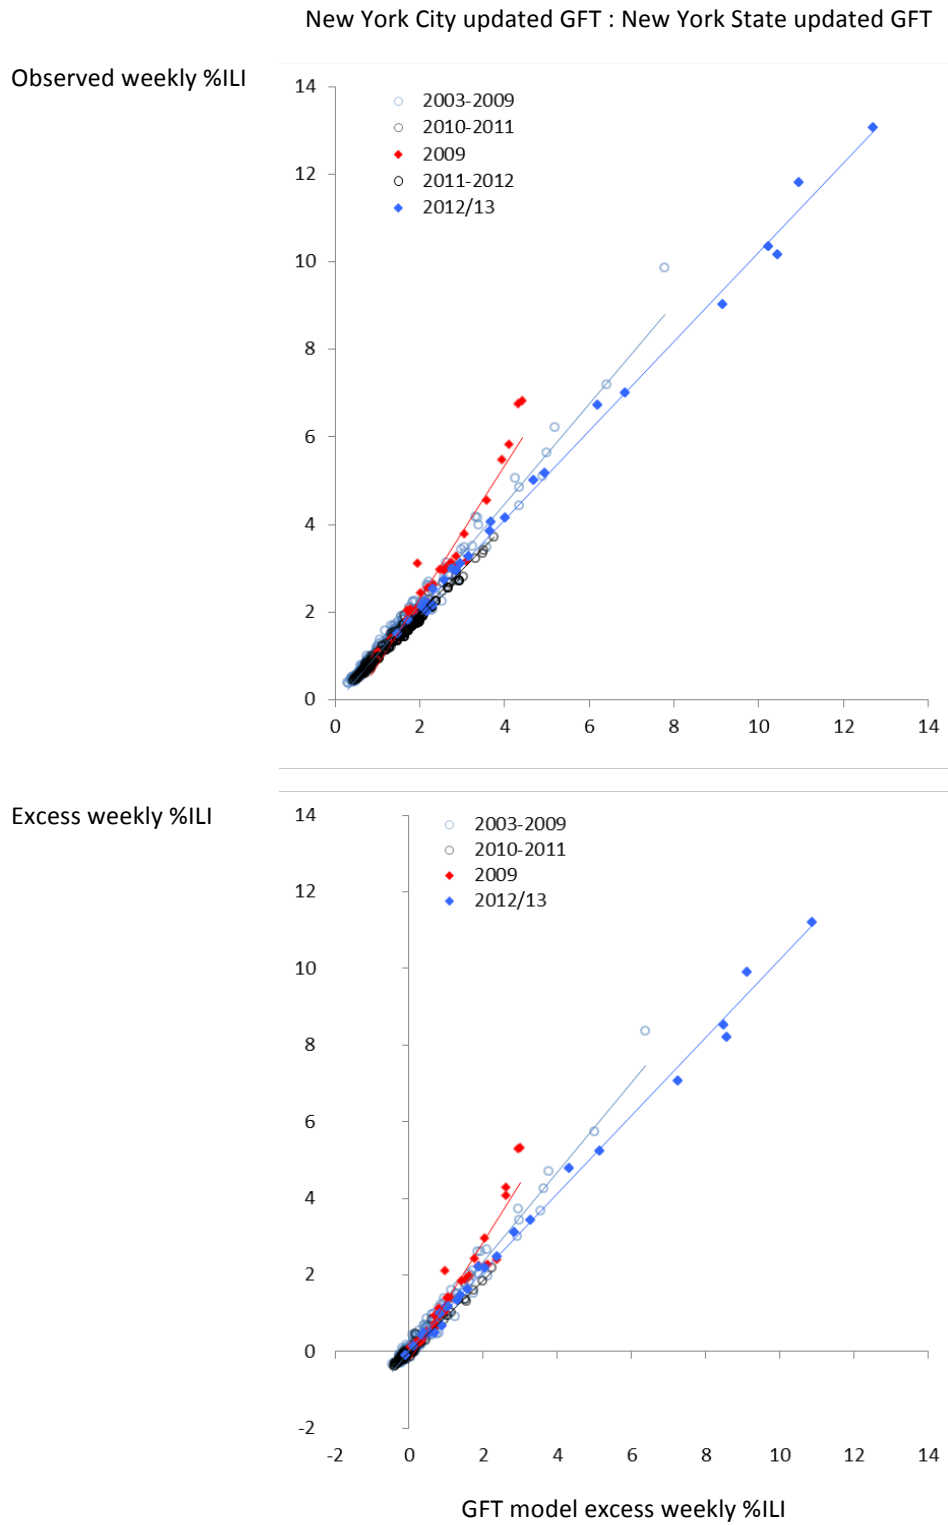

Supplement: pcbi.1003256.s006.pdf [file pcbi.1003256.s006.pdf]
