# Supplementary material for: Reassessing Google Flu Trends Data for Detection of Seasonal and Pandemic Influenza: A Comparative Epidemiological Study at Three Geographic Scales
Source: PubMed Central journal article supplement (PMC3798275; doi:10.1371/journal.pcbi.1003256), 2013-10-17
Supplement: pcbi.1003256.s007.pdf [file pcbi.1003256.s007.pdf]

**Figure S7 – Comparison of New York City emergency department (ED) influenza-like illness (ILI) syndrome surveillance and New York State Google Flu Trends (GFT) original and updated models**

NYC ED ILI : original NY GFT ILI

NYC ED ILI : updated NY GFT ILI

NYC ED ILI : updated NYC GFT ILI

Observed weekly (%ILI)

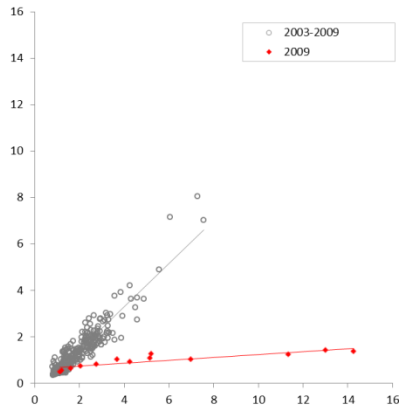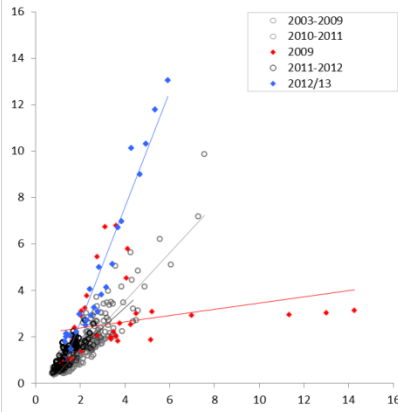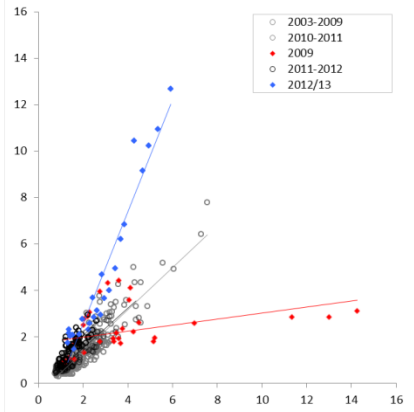

GFT model weekly %ILI
