# Supplementary material for: Reassessing Google Flu Trends Data for Detection of Seasonal and Pandemic Influenza: A Comparative Epidemiological Study at Three Geographic Scales
Source: PubMed Central journal article supplement (PMC3798275; doi:10.1371/journal.pcbi.1003256), 2013-10-17
Supplement: pcbi.1003256.s008.pdf [file pcbi.1003256.s008.pdf]

**Table S1 – Influenza epidemic season intensity, national level in the United States, 2003-2013**

**United States, CDC Sentinel Physician Network, Influenza-like Illness (ILI) Surveillance**

| Epidemic Season | weeks | excess | Epidemic period |           | peak |
|-----------------|-------|--------|-----------------|-----------|------|
|                 |       |        | lower 95%       | upper 95% |      |
| 2003/2004       | 12    | 35.66  | 31.46           | 39.86     | 7.63 |
| 2004/2005       | 15    | 27.62  | 22.37           | 32.87     | 5.44 |
| 2005/2006       | 18    | 19.49  | 13.19           | 25.79     | 3.28 |
| 2006/2007       | 16    | 17.72  | 12.12           | 23.32     | 3.58 |
| 2007/2008       | 14    | 29.75  | 24.85           | 34.65     | 5.98 |
| 2008/2009       | 9     | 11.33  | 8.18            | 14.48     | 3.57 |
| spring-2009     | 12    | 10.25  | 6.05            | 14.45     | 2.74 |
| 2009/2010       | 21    | 59.20  | 51.85           | 66.55     | 7.72 |
| 2010/2011       | 16    | 24.46  | 18.86           | 30.06     | 4.55 |
| 2011/2012       | 5     | 2.68   | 0.93            | 4.43      | 2.38 |
| 2012/2013       | 11    | 24.14  | 20.29           | 27.99     | 6.09 |

**United States, Google Flu Trends (GFT) original model**

| Epidemic Season | weeks | excess | Epidemic period |           | peak |
|-----------------|-------|--------|-----------------|-----------|------|
|                 |       |        | lower 95%       | upper 95% |      |
| 2003/2004       | 9     | 26.20  | 24.04           | 28.36     | 8.30 |
| 2004/2005       | 16    | 16.69  | 12.85           | 20.53     | 3.57 |
| 2005/2006       | 15    | 8.30   | 4.70            | 11.90     | 2.43 |
| 2006/2007       | 14    | 9.71   | 6.35            | 13.07     | 2.61 |
| 2007/2008       | 13    | 18.20  | 15.08           | 21.32     | 4.61 |
| 2008/2009       | 10    | 12.78  | 10.38           | 15.18     | 3.62 |
| spring-2009     | 1     | 0.34   | 0.10            | 0.58      | 1.53 |
| 2009/2010       | NA    | NA     | NA              | NA        | NA   |
| 2010/2011       | NA    | NA     | NA              | NA        | NA   |
| 2011/2012       | NA    | NA     | NA              | NA        | NA   |
| 2012/2013       | NA    | NA     | NA              | NA        | NA   |

**United States, Google Flu Trends (GFT) updated model**

| Epidemic Season | weeks | excess | Epidemic period |           | peak  |
|-----------------|-------|--------|-----------------|-----------|-------|
|                 |       |        | lower 95%       | upper 95% |       |
| 2003/2004       | 8     | 24.35  | 21.55           | 27.15     | 8.20  |
| 2004/2005       | 15    | 17.98  | 12.73           | 23.23     | 2.72  |
| 2005/2006       | 15    | 9.82   | 4.57            | 15.07     | 2.92  |
| 2006/2007       | 10    | 7.73   | 4.23            | 11.23     | 2.97  |
| 2007/2008       | 10    | 23.21  | 19.71           | 26.71     | 5.81  |
| 2008/2009       | 9     | 10.95  | 7.80            | 14.10     | 3.50  |
| spring-2009     | 12    | 9.70   | 5.50            | 13.90     | 2.13  |
| 2009/2010       | 17    | 43.82  | 37.87           | 49.77     | 7.11  |
| 2010/2011       | 12    | 14.87  | 10.67           | 19.07     | 4.08  |
| 2011/2012       | 5     | 3.45   | 1.70            | 5.20      | 2.86  |
| 2012/2013       | 22    | 66.30  | 58.60           | 74.00     | 10.56 |
