# Supplementary material for: Reassessing Google Flu Trends Data for Detection of Seasonal and Pandemic Influenza: A Comparative Epidemiological Study at Three Geographic Scales
Source: PubMed Central journal article supplement (PMC3798275; doi:10.1371/journal.pcbi.1003256), 2013-10-17
Supplement: pcbi.1003256.s010.pdf [file pcbi.1003256.s010.pdf]

**Table S3 – Influenza season epidemic intensity in Mid-Atlantic States, 2003-2013**

**Mid-Atlantic Census Region (NJ, NY, PA), CDC Sentinel Physician Network, Influenza-like Illness (ILI) Surveillance**

| Epidemic Season | weeks | excess | Epidemic period |           | peak |
|-----------------|-------|--------|-----------------|-----------|------|
|                 |       |        | lower 95%       | upper 95% |      |
| 2003/2004       | 12    | 18.84  | 13.56           | 24.12     | 6.48 |
| 2004/2005       | 15    | 30.56  | 23.96           | 37.16     | 4.01 |
| 2005/2006       | 12    | 13.98  | 8.70            | 19.26     | 3.16 |
| 2006/2007       | 10    | 6.11   | 1.71            | 10.51     | 3.32 |
| 2007/2008       | 14    | 17.97  | 11.81           | 24.13     | 4.04 |
| 2008/2009       | 9     | 19.12  | 15.16           | 23.08     | 4.54 |
| spring-2009     | 12    | 27.18  | 21.90           | 32.46     | 4.90 |
| 2009/2010       | 21    | 52.07  | 42.83           | 61.31     | 8.27 |
| 2010/2011       | 15    | 29.58  | 22.98           | 36.18     | 4.15 |
| 2011/2012       | 5     | -0.23  | -2.43           | 1.97      | 1.47 |
| 2012/2013       | 11    | 27.43  | 22.59           | 32.27     | 5.74 |

**HHS Surveillance Region 2 (NJ, NY), CDC Sentinel Physician Network, Influenza-like Illness (ILI) Surveillance**

| Epidemic Season | weeks | excess | Epidemic period |           | peak |
|-----------------|-------|--------|-----------------|-----------|------|
|                 |       |        | lower 95%       | upper 95% |      |
| 2003/2004       | 12    | 16.92  | 10.80           | 23.04     | 6.43 |
| 2004/2005       | 15    | 27.07  | 19.42           | 34.72     | 4.34 |
| 2005/2006       | 12    | 5.67   | -0.45           | 11.79     | 2.90 |
| 2006/2007       | 10    | 6.23   | 1.13            | 11.33     | 2.91 |
| 2007/2008       | 14    | 20.06  | 12.92           | 27.20     | 4.38 |
| 2008/2009       | 9     | 16.96  | 12.37           | 21.55     | 3.95 |
| spring-2009     | 12    | 35.76  | 29.64           | 41.88     | 6.45 |
| 2009/2010       | 21    | 52.13  | 41.42           | 62.84     | 8.12 |
| 2010/2011       | 15    | 33.79  | 26.14           | 41.44     | 4.48 |
| 2011/2012       | 5     | -0.27  | -2.82           | 2.28      | 1.35 |
| 2012/2013       | 11    | 29.19  | 23.58           | 34.80     | 5.62 |

**Mid-Atlantic Census Region (NJ, NY, PA), Google Flu Trends (GFT) original model**

| Epidemic Season | weeks | excess | Epidemic period |           | peak |
|-----------------|-------|--------|-----------------|-----------|------|
|                 |       |        | lower 95%       | upper 95% |      |
| 2003/2004       | 9     | 28.16  | 25.73           | 30.59     | 8.73 |
| 2004/2005       | 17    | 19.73  | 15.14           | 24.32     | 3.67 |
| 2005/2006       | 11    | 6.44   | 3.47            | 9.41      | 2.21 |
| 2006/2007       | 10    | 6.51   | 3.81            | 9.21      | 2.80 |
| 2007/2008       | 13    | 18.46  | 14.95           | 21.97     | 4.53 |
| 2008/2009       | 9     | 8.53   | 6.10            | 10.96     | 3.19 |
| spring-2009     | 2     | 0.57   | 0.03            | 1.11      | 1.35 |
| 2009/2010       | NA    | NA     | NA              | NA        | NA   |
| 2010/2011       | NA    | NA     | NA              | NA        | NA   |
| 2011/2012       | NA    | NA     | NA              | NA        | NA   |
| 2012/2013       | NA    | NA     | NA              | NA        | NA   |

**HHS Surveillance Region 2 (NJ, NY), Google Flu Trends (GFT) updated model**

| Epidemic Season | weeks | excess | Epidemic period |           | peak  |
|-----------------|-------|--------|-----------------|-----------|-------|
|                 |       |        | lower 95%       | upper 95% |       |
| 2003/2004       | 12    | 26.52  | 22.68           | 30.36     | 9.73  |
| 2004/2005       | 15    | 21.62  | 16.82           | 26.42     | 4.06  |
| 2005/2006       | 12    | 7.56   | 3.72            | 11.40     | 2.23  |
| 2006/2007       | 10    | 7.26   | 4.06            | 10.46     | 2.40  |
| 2007/2008       | 14    | 27.05  | 22.57           | 31.53     | 5.75  |
| 2008/2009       | 9     | 11.52  | 8.64            | 14.40     | 3.59  |
| spring-2009     | 12    | 19.21  | 15.37           | 23.05     | 3.24  |
| 2009/2010       | 21    | 40.23  | 33.51           | 46.95     | 7.05  |
| 2010/2011       | 15    | 12.87  | 8.07            | 17.67     | 3.25  |
| 2011/2012       | 5     | 0.69   | -0.91           | 2.29      | 2.41  |
| 2012/2013       | 12    | 64.79  | 60.95           | 68.63     | 12.97 |
