# Supplementary material for: Reassessing Google Flu Trends Data for Detection of Seasonal and Pandemic Influenza: A Comparative Epidemiological Study at Three Geographic Scales
Source: PubMed Central journal article supplement (PMC3798275; doi:10.1371/journal.pcbi.1003256), 2013-10-17
Supplement: pcbi.1003256.s011.pdf [file pcbi.1003256.s011.pdf]

**Table S4 – Google Flu Trends (GFT) model correlation, Mid-Atlantic States, 2003-2013**

**Mid-Atlantic States, CDC Sentinel Physician Network, Influenza-like Illness (ILI) Surveillance – original GFT model data represent the Mid-Atlantic Surveillance Census Region (NJ, NY, PA) and the updated GFT model represents Health and Human Services Surveillance Region 2 (NJ, NY)**

| Time Period                              | original GFT      |                 | updated GFT       |                 |
|------------------------------------------|-------------------|-----------------|-------------------|-----------------|
|                                          | Rsq<br>(observed) | Rsq<br>(excess) | Rsq<br>(observed) | Rsq<br>(excess) |
| Retrospective GFT model training periods | 0.79              | 0.68            | 0.77              | 0.72            |
| Prospective GFT model surveillance       | 0.27              | 0.22            | 0.58              | 0.53            |
| All study weeks                          | 0.64              | 0.49            | 0.65              | 0.59            |

| Time Period                                | original GFT      |                 | updated GFT       |                 |
|--------------------------------------------|-------------------|-----------------|-------------------|-----------------|
|                                            | Rsq<br>(observed) | Rsq<br>(excess) | Rsq<br>(observed) | Rsq<br>(excess) |
| Influenza seasons 2003-2009 (pre-pandemic) | 0.75              | 0.63            | 0.77              | 0.68            |
| March 29, 2009 - January 30, 2010          | 0.20              | 0.79            | 0.77              | 0.82            |
| - pandemic A/H1N1-2009 spring wave         | 0.51              | 0.80            | 0.82              | 0.82            |
| - pandemic A/H1N1-2009 fall wave           | NA                | NA              | 0.88              | 0.88            |
| Influenza seasons 2010/2011-2011/2012      | NA                | NA              | 0.78              | 0.72            |
| Influenza season 2012/2013                 | NA                | NA              | 0.91              | 0.90            |

| Year<br>(June-May) | original GFT      |                 | updated GFT       |                 |
|--------------------|-------------------|-----------------|-------------------|-----------------|
|                    | Rsq<br>(observed) | Rsq<br>(excess) | Rsq<br>(observed) | Rsq<br>(excess) |
| 2003-2004          | 0.95              | 0.95            | 0.93              | 0.92            |
| 2004-2005          | 0.89              | 0.82            | 0.78              | 0.67            |
| 2005-2006          | 0.88              | 0.44            | 0.68              | 0.13            |
| 2006-2007          | 0.79              | 0.40            | 0.79              | 0.45            |
| 2007-2008          | 0.95              | 0.91            | 0.92              | 0.89            |
| 2008-2009          | 0.27              | 0.22            | 0.73              | 0.83            |
| 2009-2010          | NA                | NA              | 0.92              | 0.93            |
| 2010-2011          | NA                | NA              | 0.83              | 0.75            |
| 2011-2012          | NA                | NA              | 0.37              | 0.11            |
| 2012-2013          | NA                | NA              | 0.91              | 0.91            |
