# Supplementary material for: Reassessing Google Flu Trends Data for Detection of Seasonal and Pandemic Influenza: A Comparative Epidemiological Study at Three Geographic Scales
Source: PubMed Central journal article supplement (PMC3798275; doi:10.1371/journal.pcbi.1003256), 2013-10-17
Supplement: pcbi.1003256.s012.pdf [file pcbi.1003256.s012.pdf]

**Table S5 – Influenza season epidemic intensity in New York, 2003-2013**

**New York City, Emergency Department (ED) influenza-like illness (ILI) syndromic surveillance**

| Epidemic Season | weeks | excess | Epidemic period |           | peak  |
|-----------------|-------|--------|-----------------|-----------|-------|
|                 |       |        | lower 95%       | upper 95% |       |
| 2003/2004       | 9     | 23.87  | 21.17           | 26.57     | 7.54  |
| 2004/2005       | 19    | 18.66  | 12.96           | 24.36     | 4.89  |
| 2005/2006       | 12    | 8.19   | 4.59            | 11.79     | 3.27  |
| 2006/2007       | 11    | 11.34  | 8.04            | 14.64     | 3.50  |
| 2007/2008       | 16    | 18.71  | 13.91           | 23.51     | 4.59  |
| 2008/2009       | 10    | 7.24   | 4.24            | 10.24     | 3.30  |
| spring-2009     | 11    | 55.51  | 52.21           | 58.81     | 14.25 |
| 2009/2010       | 25    | 26.46  | 18.96           | 33.96     | 4.49  |
| 2010/2011       | 15    | 15.44  | 10.94           | 19.94     | 4.38  |
| 2011/2012       | 0     | 0.00   | 0.00            | 0.00      | 2.58  |
| 2012/2013       | 12    | 23.31  | 19.71           | 26.91     | 5.91  |

**New York State, Google Flu Trends (GFT) original model**

| Epidemic Season | weeks | excess | Epidemic period |           | peak |
|-----------------|-------|--------|-----------------|-----------|------|
|                 |       |        | lower 95%       | upper 95% |      |
| 2003/2004       | 9     | 26.03  | 23.51           | 28.55     | 8.06 |
| 2004/2005       | 16    | 18.28  | 13.80           | 22.76     | 3.93 |
| 2005/2006       | 14    | 6.62   | 2.70            | 10.54     | 2.19 |
| 2006/2007       | 15    | 9.55   | 5.35            | 13.75     | 2.79 |
| 2007/2008       | 14    | 16.99  | 13.07           | 20.91     | 4.20 |
| 2008/2009       | 9     | 7.50   | 4.98            | 10.02     | 3.04 |
| spring-2009     | 3     | 1.28   | 0.44            | 2.12      | 1.42 |
| 2009/2010       | NA    | NA     | NA              | NA        | NA   |
| 2010/2011       | NA    | NA     | NA              | NA        | NA   |
| 2011/2012       | NA    | NA     | NA              | NA        | NA   |
| 2012/2013       | NA    | NA     | NA              | NA        | NA   |

**New York State, Google Flu Trends (GFT) updated model**

| Epidemic Season | weeks | excess | Epidemic period |           | peak  |
|-----------------|-------|--------|-----------------|-----------|-------|
|                 |       |        | lower 95%       | upper 95% |       |
| 2003/2004       | 8     | 27.49  | 24.85           | 30.13     | 9.87  |
| 2004/2005       | 16    | 21.62  | 16.34           | 26.90     | 4.16  |
| 2005/2006       | 14    | 8.41   | 3.79            | 13.03     | 2.25  |
| 2006/2007       | 14    | 7.91   | 3.29            | 12.53     | 2.37  |
| 2007/2008       | 14    | 26.25  | 21.63           | 30.87     | 5.63  |
| 2008/2009       | 10    | 11.22  | 7.92            | 14.52     | 3.47  |
| spring-2009     | 11    | 17.64  | 14.01           | 21.27     | 3.14  |
| 2009/2010       | 18    | 36.73  | 30.79           | 42.67     | 6.80  |
| 2010/2011       | 15    | 15.61  | 10.66           | 20.56     | 3.71  |
| 2011/2012       | 5     | 1.34   | -0.31           | 2.99      | 2.72  |
| 2012/2013       | 12    | 62.31  | 58.35           | 66.27     | 13.05 |

**New York City (experimental), Google Flu Trends (GFT) updated model**

| Epidemic Season | weeks | excess | Epidemic period |           | peak  |
|-----------------|-------|--------|-----------------|-----------|-------|
|                 |       |        | lower 95%       | upper 95% |       |
| 2003/2004       | 9     | 24.13  | 20.80           | 27.46     | 7.79  |
| 2004/2005       | 15    | 17.28  | 11.73           | 22.83     | 3.38  |
| 2005/2006       | 11    | 5.72   | 1.65            | 9.79      | 2.33  |
| 2006/2007       | 7     | 5.01   | 2.42            | 7.60      | 2.38  |
| 2007/2008       | 13    | 22.83  | 18.02           | 27.64     | 4.99  |
| 2008/2009       | 8     | 8.24   | 5.28            | 11.20     | 3.08  |
| spring-2009     | 12    | 15.36  | 10.92           | 19.80     | 3.11  |
| 2009/2010       | 15    | 24.34  | 18.79           | 29.89     | 4.43  |
| 2010/2011       | 12    | 15.48  | 11.04           | 19.92     | 3.76  |
| 2011/2012       | 5     | 2.15   | 0.30            | 4.00      | 2.94  |
| 2012/2013       | 21    | 71.71  | 63.94           | 79.48     | 12.69 |
